# Supplementary material
Source: PubMed Central journal article supplement (PMC7817147)
Supplement: pnas.2011763118.sapp.pdf [file pnas.2011763118.sapp.pdf]

**Figure S1.**

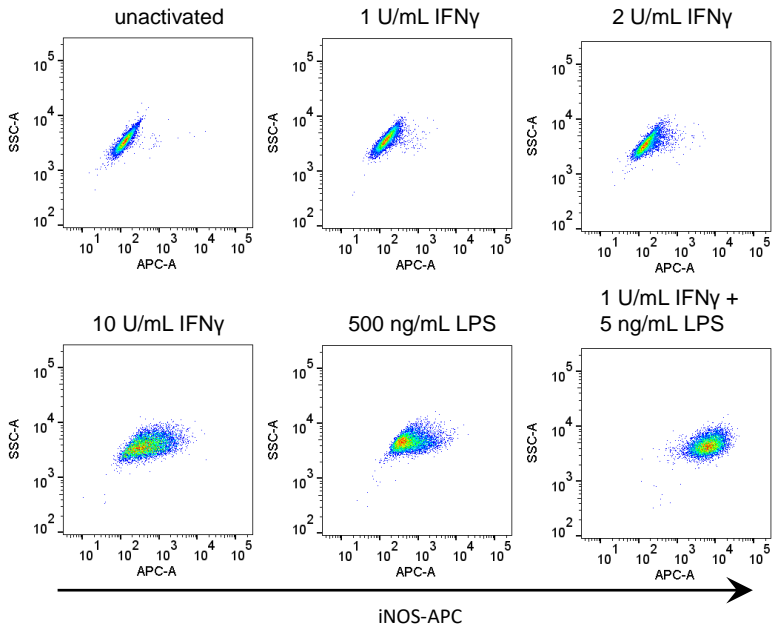

**Figure S2.**

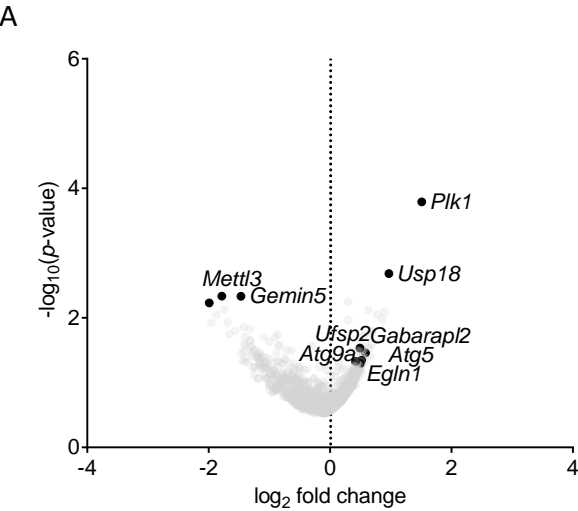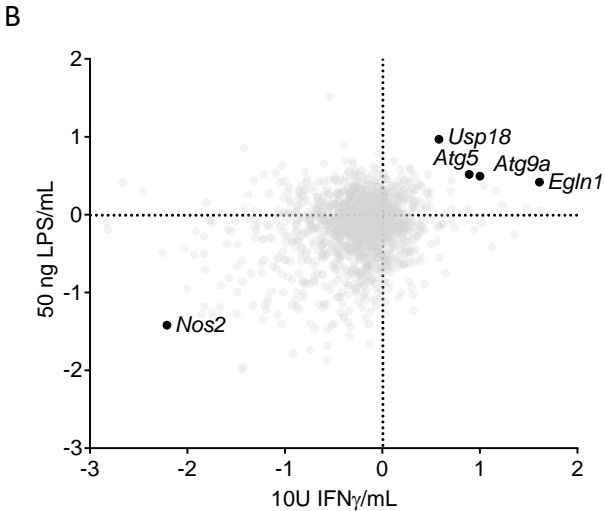

# Figure S3.

A

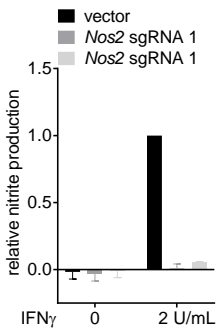

B

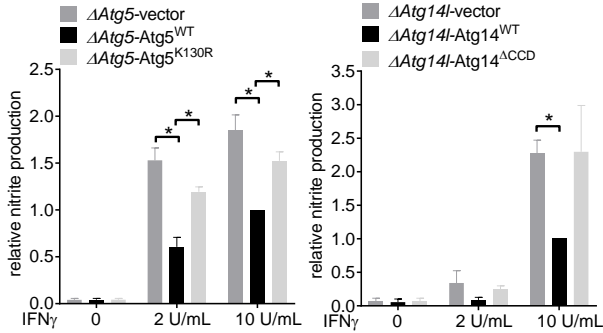

C

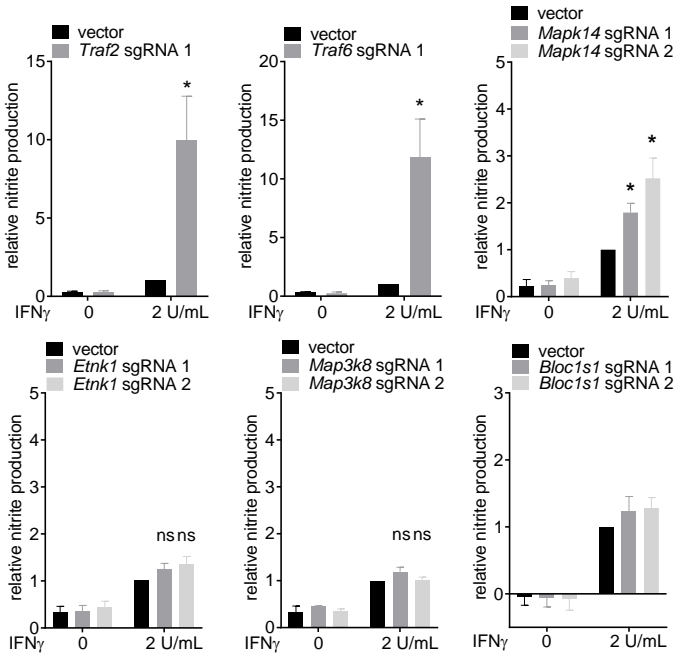

# Figure S4.

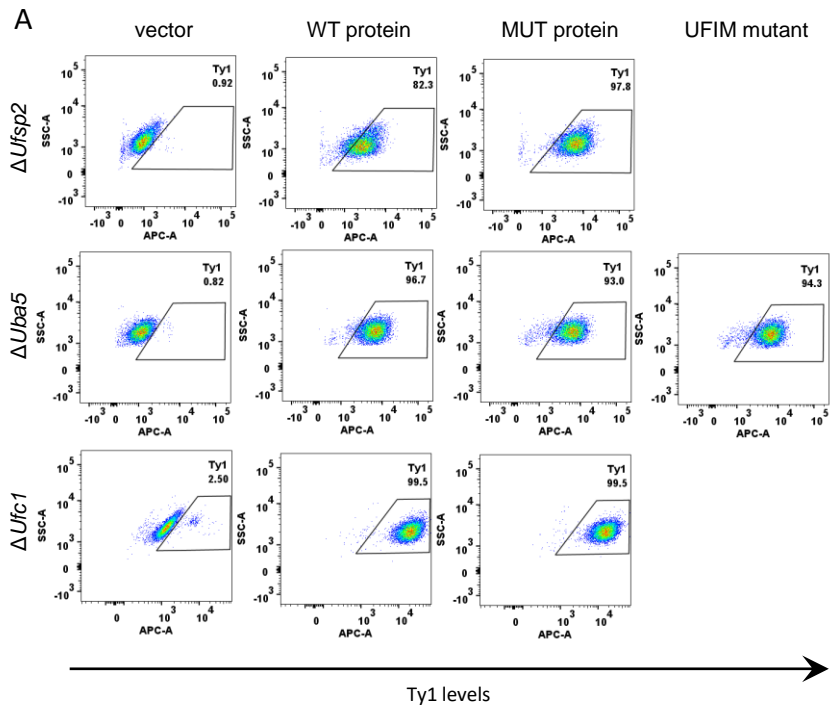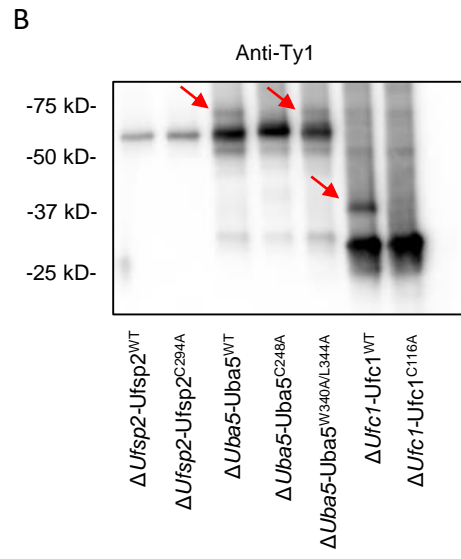

# Figure S5

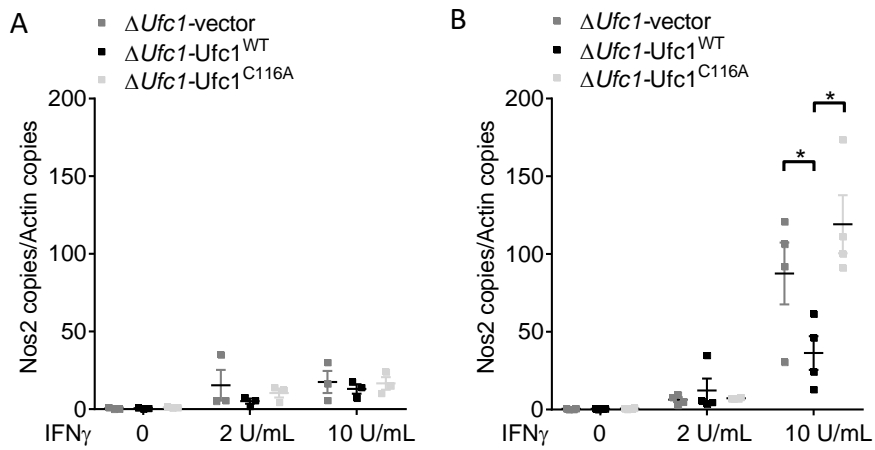

# Figure S6.

A

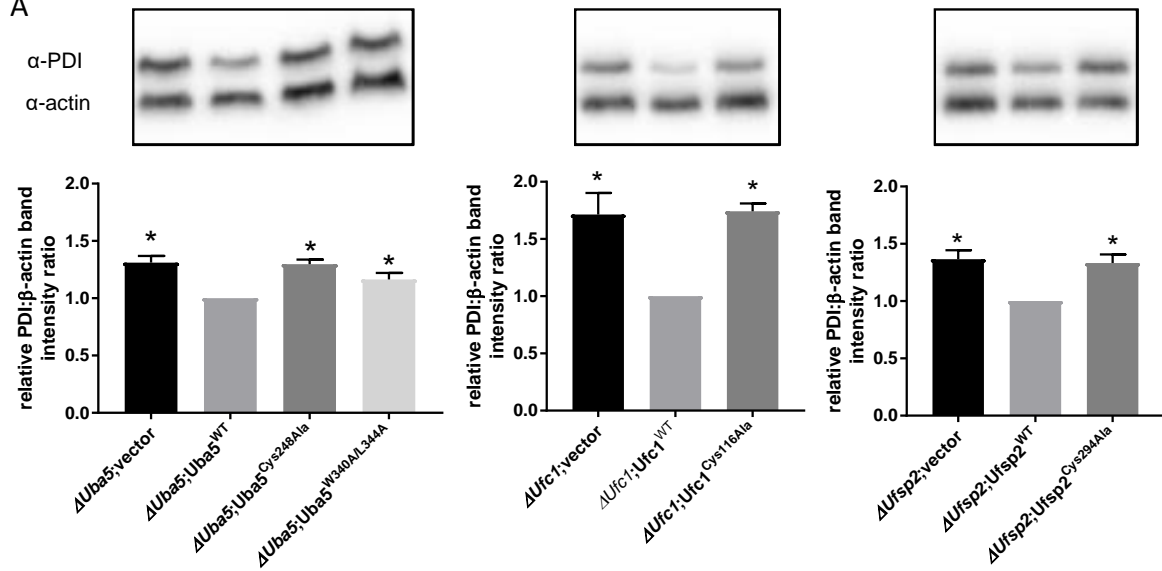

B

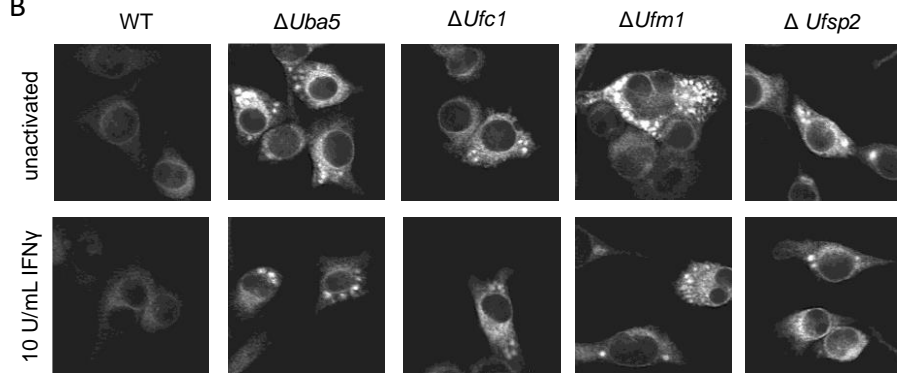

C

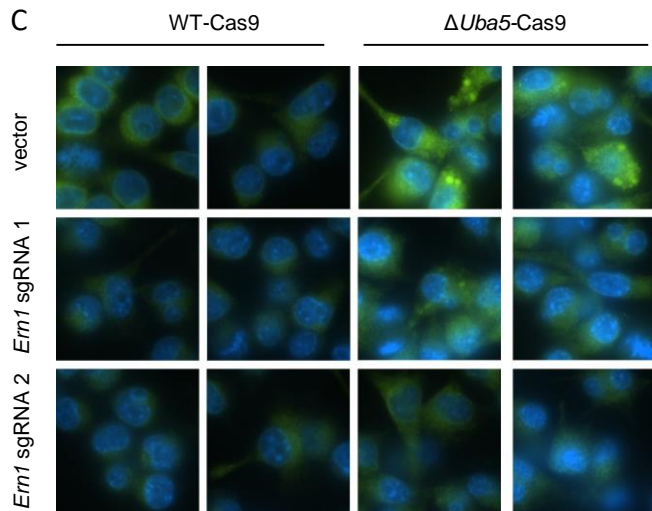

# Figure S7.

A

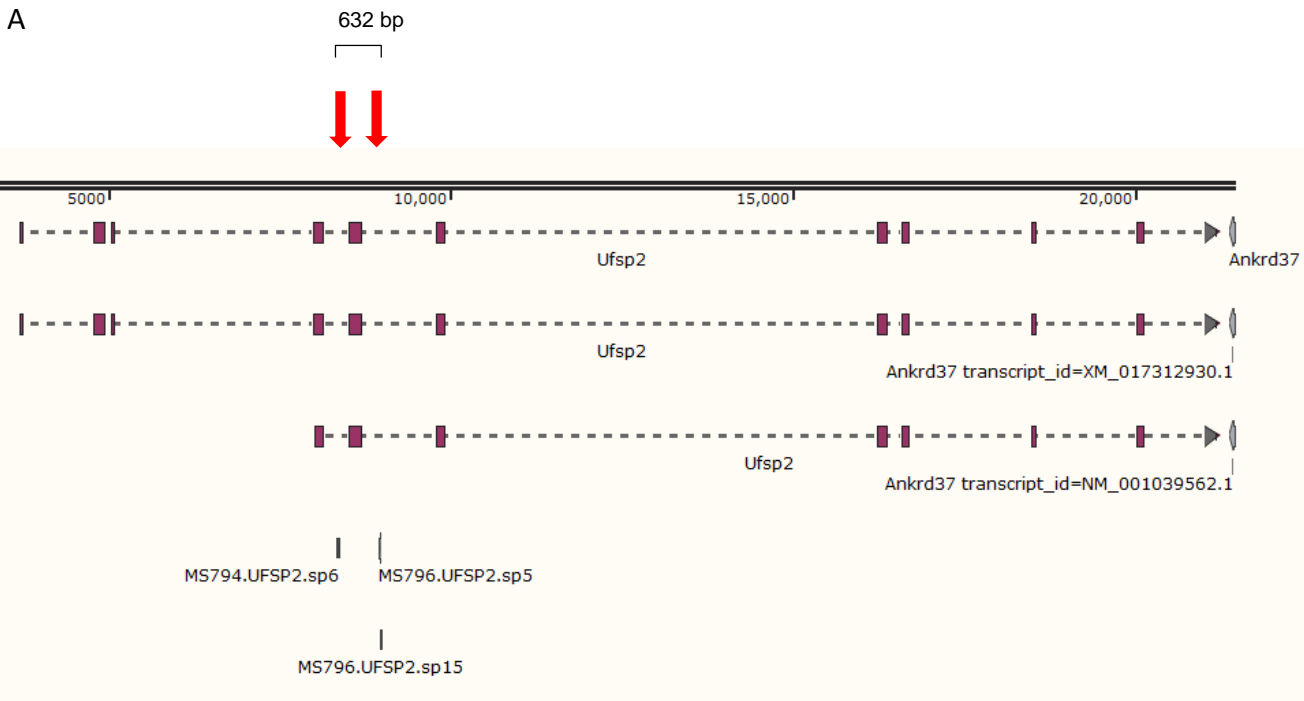

B

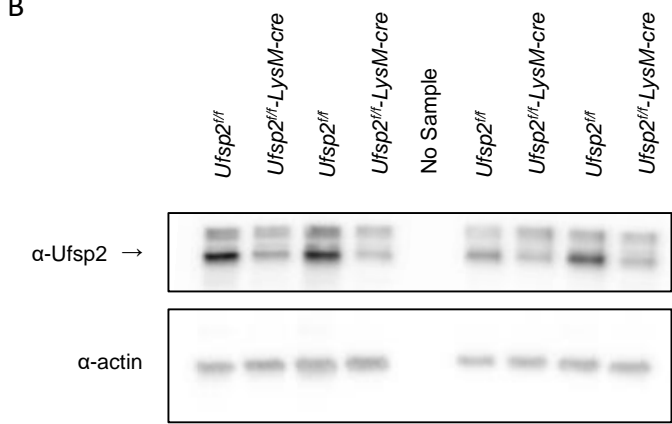

**Figure S1. IFN $\gamma$ - and LPS-dependent iNOS expression in BV2 cells. Related to Figure 1.** (A)

Representative flow cytometry plots of two independent experiments showing iNOS expression in WT BV2 cells stimulated for 16 hrs with increasing concentrations of IFN $\gamma$  and/or LPS.

**Figure S2. Results of subpool library cells treated with LPS. Related to Figure 1.** (A)

Volcano plot of genes enriched in the top 10 % of iNOS2-high library BV2-Cas9 cells treated with 50 ng LPS/mL. The average log<sub>2</sub> fold change (LFC) of all sgRNAs for each gene is plotted against the  $-\log_{10}(\text{p-value})$  for each gene. Select genes of interest are labelled. (B) Comparison of gene-level average LFC from the LPS and IFN $\gamma$  (10 U/mL) subpool screen results.

**Figure S3. Validation of additional CRISPR screen hits. Related to Figure 2.** (A)

Average NO production in cells expressing sgRNAs targeting *Nos2* (2 independent experiments). (B) Average NO production in  $\Delta\text{Atg5}$  and  $\Delta\text{Atg14l}$  cells expressing empty vector, WT protein or known functional mutants. Data are represented as mean  $\pm$  SEM of 3 independent experiments relative to  $\Delta\text{Atg5}/\Delta\text{Atg14l}$  expressing WT protein stimulated with 10 U IFN $\gamma$ /mL. (C) Average NO production in cells expressing sgRNAs targeting additional CRISPR screen hits. Data are represented as mean  $\pm$  SEM of 4-6 independent experiments normalized to IFN $\gamma$ -activated WT BV2:Cas9 cells transduced with lentivirus carrying empty vector. (2 independent experiments for *Bloc1s1*) \*  $P < 0.05$  determined by ANOVA with Tukey's multiple comparison test. ns = not statistically significant.

**Figure S4. Expression of complemented proteins in  $\Delta\text{Ufsp2}/\Delta\text{Uba5}/\Delta\text{Ufc1}$  cells. Related to Figure 3.** (A)

Flow cytometry plots showing Ty1 levels (detected using anti-Ty1 and AF647-conjugated secondary) in  $\Delta\text{Ufsp2}/\Delta\text{Uba5}/\Delta\text{Ufc1}$  cells and cells reconstituted with WT protein or functionally inactive mutant protein or the UFIM mutant for *Uba5*. (B) Western immunoblot for Ty1-tagged WT protein or functionally inactive mutant protein or the UFIM mutant for *Uba5* in  $\Delta\text{Ufsp2}/\Delta\text{Uba5}/\Delta\text{Ufc1}$  cells. Red arrows indicate presence of an additional band which may represent the intermediate thioester between Ty1-tagged *Uba5/Ufc1* and *Ufm1*.



**Figure S5. Ufc1 decreases the steady state levels of mRNAs for Nos2 in response to IFN $\gamma$  activation.**

**Related to Figure 4.** (A-B) RT-qPCR measurements of *Nos2* transcripts normalized to Actin transcripts in cells activated with IFN $\gamma$  for (A) 8 hr and (B) 24 hr. Data are represented as mean  $\pm$  SEM. \*  $P < 0.05$  determined by ANOVA with Tukey's multiple comparison test.

**Figure S6. UFMylation regulates ER membrane expansion. Related to Figure 5 and Figure 6.**

(A) Western immunoblot representative images and measurements of the PDI to Actin band intensity ratio in  $\Delta Ufsp2/\Delta Uba5/\Delta Ufc1$  cells and cells reconstituted with WT protein or functionally inactive mutant protein or the UFIM mutant for *Uba5*. Average PDI:actin band intensity ratio pooled from 4-5 independent experiments are shown as mean  $\pm$  SEM relative to knockout cells expressing WT protein. Data are represented as mean  $\pm$  SEM. \*  $P < 0.05$  determined by ANOVA with Tukey's multiple comparison test. (B) Immunofluorescence of the ER protein PDI in WT and  $\Delta Uba5/\Delta Ufc1/\Delta Ufm1/\Delta Ufsp2$  cells. (C) Representative immunofluorescence images of PDI in WT-Cas9 and  $\Delta Uba5$ -Cas9 expressing control vector or sgRNAs targeting *Ern1*.

**Figure S7. Generation of *Ufsp2<sup>ff</sup>-LysM-cre* mice. Related to Figure 7.**

(A) *Ufsp2* floxed allele strategy. (B) Western immunoblot for *Ufsp2* and beta-actin in the adherent fraction of peritoneal exudate cells from the indicated mice (4 independent mice from each genotype).
